# Supplementary material
Source: publisher site journal article supplement (https://www.dovepress.com/article/552979)
Supplement: Supplementary file 1 [file Supporting%20Information.docx]

**Supporting Information**

**Box S1. List of questions used to prompt LLMs.**

| **Descriptive questions with moderate complexity:** |
| --- |
| - What are the causes of vitiligo? |
| - What are the symptoms of vitiligo? |
| - How is vitiligo treated? |
| -How can the recurrence of vitiligo be prevented? |
| **Highly complex/Advanced:** |
| - My father has vitiligo, what is the likelihood that I will develop it? |
| - Does vitiligo only affect appearance, or are there other impacts? |
| - I am currently in the active phase of vitiligo, and I have been recommended to undergo narrowband UVB phototherapy. Is this an effective treatment? |
| - Some people say that vitiligo patients should avoid vitamin C and vitamin C-rich foods, such as fruits. Is this valid advice? |
| **Recommendatory questions with moderate complexity:** |
| - I have previously had vitiligo, and recently the white patches have increased in size. What should I do? |
| - I suspect I have vitiligo. What tests do I need to undergo? |
| - Vitiligo makes me feel insecure. How should I manage my emotions? |
| - How should vitiligo patients conceal their white patches? |
| **Highly complex/Advanced:** |
| - I am 10 years old, and I have had white patches on my face for 2 months, which have gradually increased in size. What disease might I have? |
| - I am 30 years old, I noticed vitiligo a month ago, and I am currently 20 weeks pregnant. What treatment method is suitable for me? |
| - I am 20 years old, have had vitiligo on my hand for 5 years, and in the past year, the white patches have not increased in size. What treatment is suitable for me now? |
| - I am 30 years old, noticed vitiligo a month ago, and recently the white patches have become whiter but the area has not increased. What treatment method is suitable for me now? |

**Table S1. Evaluation of vitiligo recommendations from reasoning large language models.**

|  | **Accuracy** | | | **Completeness** | | | **Relevance** | | | **Comprehensibility** | | |
| --- | --- | --- | --- | --- | --- | --- | --- | --- | --- | --- | --- | --- |
| **Question** | O1 | DeepSeek | Grok3 | O1 | DeepSeek | Grok3 | O1 | DeepSeek | Grok3 | O1 | DeepSeek | Grok3 |
| 1.1 What are the causes of vitiligo? | 5/4/5 | 5/5/5 | 5/5/5 | 4/4/5 | 4/4/4 | 4/4/4 | 5/5/5 | 5/5/5 | 5/5/5 | 4/4/4 | 5/4/5 | 5/4/5 |
| 1.2 What are the symptoms of vitiligo? | 5/5/5 | 5/5/5 | 5/5/5 | 4/5/5 | 4/5/5 | 4/4/5 | 5/5/5 | 5/5/5 | 5/5/5 | 4/4/4 | 5/5/5 | 5/5/5 |
| 1.3 How is vitiligo treated? | 5/5/5 | 4/5/4 | 4/4/5 | 4/4/5 | 3/3/4 | 3/3/3 | 5/5/5 | 5/5/5 | 5/5/5 | 4/5/5 | 5/4/5 | 5/5/5 |
| 1.4 How can the recurrence of vitiligo be prevented? | 5/5/5 | 4/5/4 | 5/5/5 | 5/5/5 | 4/4/4 | 4/5/5 | 5/5/5 | 4/4/4 | 5/5/5 | 4/4/4 | 5/5/5 | 5/4/5 |
| 2.1 My father has vitiligo, what is the likelihood that I will develop it? | 5/5/5 | 5/4/4 | 5/5/4 | 5/5/5 | 4/4/4 | 5/5/5 | 5/5/5 | 5/5/5 | 5/5/5 | 5/5/5 | 5/5/5 | 5/5/5 |
| 2.2 Does vitiligo only affect appearance, or are there other impacts? | 5/5/5 | 4/4/4 | 5/5/5 | 5/5/5 | 4/4/4 | 5/5/5 | 5/5/5 | 4/4/5 | 5/5/5 | 5/5/5 | 5/5/5 | 5/5/5 |
| 2.3 I am currently in the active phase of vitiligo, and I have been recommended to undergo narrowband UVB phototherapy. Is this an effective treatment? | 5/4/5 | 4/4/4 | 4/4/4 | 5/5/5 | 4/4/5 | 4/4/4 | 5/5/5 | 5/5/5 | 5/5/5 | 5/5/5 | 5/5/5 | 5/5/4 |
| 2.4 Some people say that vitiligo patients should avoid vitamin C and vitamin C-rich foods, such as fruits. Is this valid advice? | 4/5/5 | 4/5/5 | 5/5/5 | 4/5/5 | 4/5/5 | 5/5/5 | 5/5/5 | 5/5/5 | 5/5/5 | 5/5/5 | 5/5/5 | 5/5/5 |
| 3.1 I have previously had vitiligo, and recently the white patches have increased in size. What should I do? | 5/5/5 | 4/4/4 | 3/4/3 | 5/5/5 | 3/3/4 | 2/3/2 | 5/5/5 | 5/5/5 | 5/5/5 | 5/5/5 | 5/5/5 | 5/4/5 |
| 3.2 I suspect I have vitiligo. What tests do I need to undergo? | 5/5/5 | 5/5/5 | 4/4/4 | 5/5/5 | 5/4/4 | 4/4/4 | 5/5/5 | 5/5/5 | 5/5/5 | 5/5/5 | 5/4/5 | 5/5/5 |
| 3.3 Vitiligo makes me feel insecure. How should I manage my emotions? | 4/5/5 | 4/4/5 | 4/4/5 | 5/5/4 | 4/4/5 | 4/4/4 | 5/5/5 | 5/5/5 | 5/5/5 | 4/4/5 | 5/5/5 | 5/5/5 |
| 3.4 How should vitiligo patients conceal their white patches? | 5/5/5 | 5/5/5 | 5/5/5 | 5/5/5 | 5/5/5 | 4/4/4 | 5/5/5 | 5/5/5 | 5/5/5 | 5/5/5 | 5/5/5 | 5/5/5 |
| 4.1 I am 10 years old, and I have had white patches on my face for 2 months, which have gradually increased in size. What disease might I have? | 5/4/5 | 4/5/5 | 5/4/5 | 5/4/4 | 4/4/4 | 5/5/5 | 5/5/5 | 5/5/5 | 5/5/5 | 5/5/5 | 5/5/5 | 5/5/5 |
| 4.2 I am 30 years old, I noticed vitiligo a month ago, and I am currently 20 weeks pregnant. What treatment method is suitable for me? | 5/5/5 | 1/1/2 | 1/1/2 | 5/4/5 | 4/4/4 | 4/4/4 | 5/5/5 | 5/5/5 | 5/5/5 | 5/5/5 | 5/5/5 | 5/5/5 |
| 4.3 I am 20 years old, have had vitiligo on my hand for 5 years, and in the past year, the white patches have not increased in size. What treatment is suitable for me now? | 5/5/4 | 5/4/5 | 5/5/5 | 5/5/5 | 5/5/5 | 5/5/5 | 5/5/5 | 5/5/5 | 5/5/5 | 5/5/5 | 5/5/5 | 5/5/5 |
| 4.4 I am 30 years old, noticed vitiligo a month ago, and recently the white patches have become whiter but the area has not increased. What treatment method is suitable for me now? | 2/2/1 | 4/4/5 | 4/4/4 | 4/4/5 | 4/4/4 | 4/4/4 | 5/5/5 | 5/5/5 | 5/5/5 | 5/5/5 | 5/5/5 | 5/5/5 |
